# Supplementary material for: Coffee consumption and risk of prostate cancer: a systematic review and meta-analysis
Source: PubMed Central journal article supplement — BMJ Open. 2021 Jan 7;11(2):e038902. doi: 10.1136/bmjopen-2020-038902 (PMC7805365; doi:10.1136/bmjopen-2020-038902), 2021-01-07
Supplement: bmjopen-2020-038902supp006.pdf [file bmjopen-2020-038902supp006.pdf]

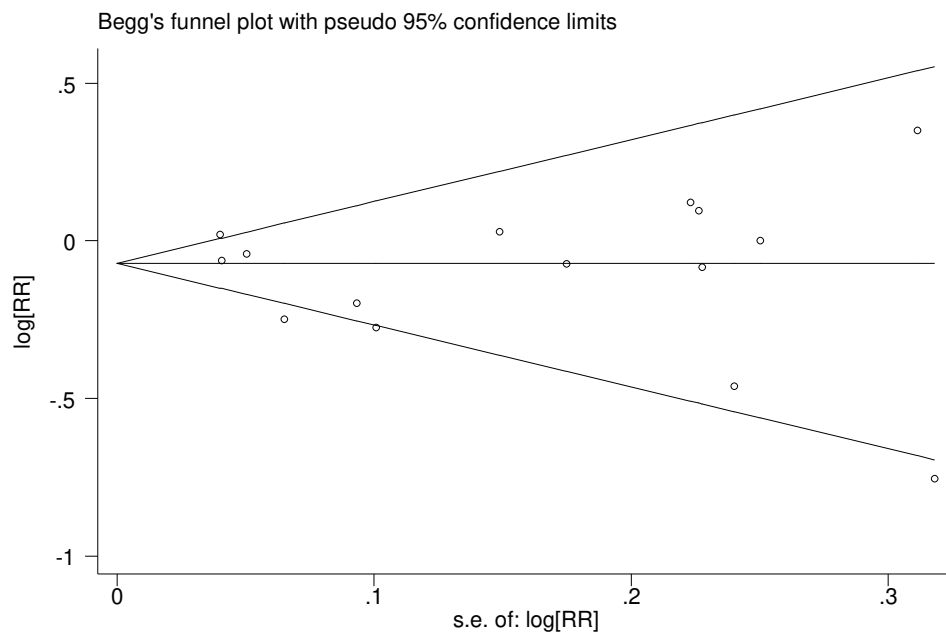

**Figure S1** Begg's funnel plot of coffee consumption and prostate cancer risk

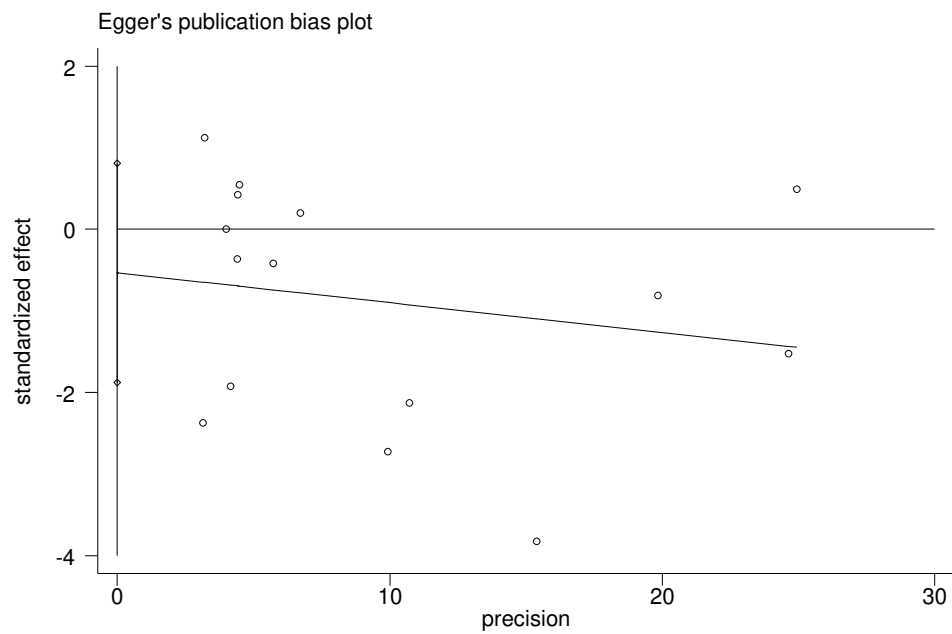

**Figure S2** Egger's publication bias plot of coffee consumption and prostate cancer risk
